# Optimizing non-invasive sampling of an infectious bat virus

John R. Giles<sup>1,2\*</sup>, Alison J. Peel<sup>2a</sup>, Konstans Wells<sup>3b</sup>, Raina K. Plowright<sup>4c</sup>, Hamish McCallum<sup>2d</sup>, and Olivier Restif<sup>5e</sup>

<sup>1</sup>Johns Hopkins University Bloomberg School of Public Health,  
Department of Epidemiology, Baltimore, MD 21205, USA

<sup>2</sup>Environmental Futures Research Institute, Griffith University,  
Brisbane, Queensland 4111, Australia

<sup>3</sup>College of Science, Swansea University, Swansea SA2 8PP, UK

<sup>4</sup>Department of Microbiology and Immunology, Montana State  
University, Bozeman, Montana 59717, USA

<sup>5</sup>Disease Dynamics Unit, Department of Veterinary Medicine,  
University of Cambridge, Cambridge, United Kingdom

\*Corresponding author: gilesjohnr@gmail.com

<sup>a</sup>alisonpeel@gmail.com

<sup>b</sup>konswells@gmail.com

<sup>c</sup>rplowright@gmail.com

<sup>d</sup>h.mccallum@griffith.edu.au

<sup>e</sup>or226@cam.ac.uk

## Abstract

1  
2 Notable outbreaks of infectious viruses resulting from spillover events from bats  
3 have brought much attention to the ecological origins of bat-borne zoonoses, re-  
4 sulting in an increase in ecological and epidemiological studies on bat populations  
5 in Africa, Asia, and Australia. The aim of many of these studies is to identify new  
6 viral agents with field sampling methods that collect pooled urine samples from  
7 large plastic sheets placed under a bat roost. The efficiency of under-roost sam-  
8 pling also makes it an attractive method for gathering roost-level prevalence data.  
9 However, the method allows multiple individuals to contribute to a pooled sample,  
10 potentially introducing positive bias. To assess the ability of under-roost sampling  
11 to accurately estimate viral prevalence, we constructed a probabilistic model to  
12 explore the relationship between four sampling designs (quadrant, uniform, strat-  
13 ified, and random) and estimation bias. We modeled bat density and movement  
14 with a Poisson cluster process and spatial kernels, and simulated the four under-  
15 roost sheet sampling designs by manipulating a spatial grid of hexagonal tiles. We  
16 performed global sensitivity analyses to identify major sources of estimation bias  
17 and provide recommendations for field studies that wish to estimate roost-level  
18 prevalence. We found that the quadrant-based design had a positive bias 5–7 times  
19 higher than other designs due to spatial auto-correlation among sampling sheets  
20 and clustering of bats in the roost. The sampling technique is therefore highly  
21 sensitive to viral presence; but lacks specificity, providing poor information re-  
22 garding dynamics in viral prevalence. Given population sizes of 5000–14000, our  
23 simulation results indicate that using a stratified random design to collect 30–40  
24 urine samples from 80–100 sheets, each with an area of 0.75–1m<sup>2</sup>, would provide  
25 sufficient estimation of true prevalence with minimum sampling bias and false neg-  
26 atives. However, acknowledging the general problem of data aggregation, we em-  
27 phasize that robust inference of true prevalence from field data require information  
28 of underpinning roost sizes. Our findings refine our understanding of the under-  
29 roost sampling technique with the aim of increasing its specificity, and suggest that  
30 the method be further developed as an efficient non-invasive sampling technique  
31 that provides roost-level estimates of viral prevalence within a bat population.

## 32 Introduction

33 Recent emergence of bat-borne viruses has motivated an increase in ecological and epi-  
34 demiological studies on bat populations in Africa, Asia, and Australia (Calisher et al.  
35 2006, Halpin et al. 2007, Wang and Cowled 2015). Little was known about these  
36 pathogens at the outset of investigation, so research focused first on discovering the  
37 reservoir host(s), as demonstrated by Hendra virus in Australia (Halpin et al. 2000),  
38 Nipah virus in Malaysia (Chua et al. 2002), SARS in China (Li et al. 2005), Marburg  
39 in Africa (Towner et al. 2009), and Ebola viruses in Africa (Breman et al. 1999) and  
40 the Philippines (Jayme et al. 2015). Further, considerable effort is now invested into  
41 identifying additional unknown viral pathogens in bats that have epidemic potential; an  
42 important undertaking that minimizes spillover risk via vaccine development, predict-  
43 ing epidemic potential, and developing assays to detect the virus in humans and wildlife  
44 (Anthony et al. 2013, Drexler et al. 2012, Quan et al. 2013, Smith and Wang 2013).  
45 Discovering a virus and identifying its reservoir host(s) is also the first step in describ-  
46 ing viral *dynamics* (patterns of viral presence in bat populations over space and time),  
47 which provide insights into the broader ecological context surrounding spillover and  
48 precursors to the emergence of bat-borne viral diseases in humans (Hayman et al. 2013,  
49 Plowright et al. 2015, Wood et al. 2012).

50 A common approach, in bat-borne disease research, involves the capture of many in-  
51 dividual bats repeatedly over time, where bats are sampled (e.g. serum, urine, saliva) and  
52 tested for viral presence using serology or PCR techniques. Best case scenario, longitu-  
53 dinal samples are obtained for multiple individuals, enabling both the discovery of new  
54 viruses and description of dynamics in individual-level viral prevalence. Individual-  
55 level longitudinal data are more common for high-fidelity cave-roosting bats which can  
56 be recaptured frequently at the same roosting site (Streicker et al. 2012, Towner et al.  
57 2009). However, these type of longitudinal data are much more difficult to gather from  
58 the tree roosting megachiroptera, such as *Pteropus* and *Eidolon* genera (Hayman et al.  
59 2012), which are highly-mobile nomadic foragers, making them poor candidates for  
60 ecological studies that rely on recapture of individuals. Therefore, recent research has  
61 supplemented the capture of individual bats with a non-invasive sampling technique that  
62 uses plastic sheets to collect urine and feces under bat roosts (Baker et al. 2012, Baker  
63 et al. 2013, Chua 2003, Chua et al. 2002, 2001, Edson et al. 2015a, Field et al. 2011,

64 2015, Marsh et al. 2012, Pritchard et al. 2006, Smith et al. 2011, Wacharapluesadee  
65 et al. 2010).

66 For several viruses of public health interest, urinary excretion is a primary route of  
67 transmission (e.g. Nipah virus in Asia and Australia (Middleton et al. 2007, Wachara-  
68 pluesadee et al. 2005), Hendra virus in Australia (Edson et al. 2015b), and both Heni-  
69 paviruses (Iehl e et al. 2007) and Marburg virus in Africa (Amman et al. 2012)). The  
70 under-roost sampling technique takes advantage of this particular mode of transmis-  
71 sion to achieve longitudinal sampling of a bat population at the *roost-scale* that is both  
72 cost-effective and reduces exposure to infectious viruses compared to catching individ-  
73 ual bats. Under-roost sheet sampling was initially implemented in 1998 to isolate Nipah  
74 and Tioman virus from *Pteropus hypomelanus* and *P. vampyrus* in Malaysia (Chua 2003,  
75 Chua et al. 2002, 2001). Under-roost sampling designs typically use large sheets placed  
76 under roost trees, and urine droplets are pooled into an aggregate sample from the area  
77 (or sub-area) of each sheet. Most studies provide minimal description of the sheet sam-  
78 pling design, however Edson et al. (2015a), Field et al. (2015), and Wacharapluesadee  
79 et al. (2010) describe their methods in greater detail (i.e. sheet dimensions, number of  
80 sheets, pooling of urine samples). In general, the under-roost sampling technique was  
81 initially designed to isolate viral agents, not necessarily study viral dynamics, however  
82 a few recent studies have also employed the technique to collect longitudinal data and  
83 describe patterns in viral prevalence for Nipah virus in Malaysia (Wacharapluesadee et  
84 al. 2010) and Hendra virus in Australia (Field et al. 2015, P aez et al. 2017). However,  
85 the extent to which the data are vulnerable to sampling bias has not been explored.

86 The most salient complication is that under-roost sampling estimates individual-  
87 level prevalence with sheet-level prevalence. In this scenario, binomial samples are  
88 comprised of urine droplets from an ‘area’, which are pooled to constitute sufficient  
89 volume for an array of molecular assays (i.e. PCR and/or whole genome sequencing).  
90 Although this is a necessary compromise, the clustered nature of bat density within a  
91 roost acts as a confounder that allows an unknown number of individuals to contribute  
92 to a sample. In this manner, under-roost sampling may introduce systematic sampling  
93 bias in the form of increased sensitivity of viral detection assays.

94 The increased sensitivity of pooled samples is well-known. Sample pooling was first  
95 used during world war II to avoid the ‘expensive and tedious’ process of monitoring  
96 syphilis in US soldiers (Dorfman 1943), and since, it has been used as a cost-effective

97 method to screen for HIV infection in developing countries (Behets et al. 1990). ‘Herd-  
98 level’ testing is also common in surveillance of livestock diseases where a pooled sam-  
99 ple is used to determine presence or absence of a disease within the herd (Christensen  
100 and Gardner 2000); if the herd is found positive, individual-level samples are then used  
101 to identify infected individuals or calculate prevalence more accurately (Litvak et al.  
102 1994). In this regard, pooling urine samples as part of the under-roost sampling method  
103 is well-suited for surveillance of bat viruses because the higher sensitivity of pooled  
104 sample testing is advantageous when individual-level prevalence is very low (Muñoz-  
105 Zanzi et al. 2006). Conversely, the high sensitivity of pooled samples is problematic  
106 when used to estimate individual-level prevalence (Cowling et al. 1999)—a classic sta-  
107 tistical problem resulting from data aggregation, often referred to as the ‘ecological  
108 fallacy’ (Robinson 2009).

109 Our aim, therefore, is to contribute the first modeling study to theoretically explore  
110 the application of under-roost sheet sampling in a generic tree roosting bat population  
111 and quantify the potential sampling bias introduced by different sampling techniques.  
112 We focus on tree roosting pteropid bats because they are reservoir hosts of several  
113 viruses considered to be a public health risk, and based on their highly mobile popu-  
114 lation structure, under-roost sampling techniques are especially useful. Specifically, we  
115 explore four questions in detail: 1) Given different under-roost sheet sampling designs,  
116 how accurately is individual-level viral prevalence estimated? 2) What is the estima-  
117 tion bias across all values of individual-level prevalence? 3) What are the major drivers  
118 of estimation bias? And 4) If you reduce the size of the sheets on which samples are  
119 pooled, and increase their number, can you reduce sampling bias and provide an accept-  
120 able estimate of individual-level prevalence? To address these questions, we designed  
121 four simulation scenarios comprised of a probabilistic model of bat density within a  
122 generic roost of tree roosting pteropid bats and four under-roost sheet sampling designs  
123 (quadrant, uniform, stratified, and random). We then explore the parameter space of  
124 these scenarios and perform global sensitivity analysis to determine the primary drivers  
125 of estimation bias. Our results provide some useful recommendations on how to apply  
126 under-roost sampling for the surveillance of infectious bat viruses.

## 127 **Methods**

### 128 **Modeling bat density in a roost**

129 Pteropid bat roosts can be spread out and encompass many trees, with individuals mov-  
130 ing frequently within the roost, so we modeled bat density within a generic bat roost  
131 with a Poisson cluster process of roosting positions and a spatial Gompertz probability  
132 density function that reflects movement within a roosting site. Specifically, bat density  
133 within roost area  $A$  (a disc with radius  $r$ ) is constructed in four stages that include: 1)  
134 placement of roosting trees within the roost area, 2) clustering of individuals around  
135 them, 3) individual-level movement within a tree, and 4) a separate model of roost-wide  
136 movement. We used a Thomas cluster process to simulate the spatial clustering of bat  
137 positions around trees, using the `rThomas` function from the `spatstat` package in  
138 the R programming language (Baddeley et al. 2015, R Core Team 2016). Tree locations  
139 (parent points) were randomly distributed within  $A$  subject to a homogeneous intensity  
140  $\kappa$ , given by  $n_t/A$ , where  $n_t$  is the number of occupied trees in the roost. The mean  
141 number of bats in each roost tree  $\mu$  is simulated by the cluster point process which is  
142 Poisson distributed with mean  $\mu$ . Individual bat positions are determined according to  
143 an isotropic Gaussian kernel centered on each tree with radius  $r_t$ . Note that even when  
144 parameters  $\kappa$ ,  $r_t$ , and  $\mu$  are fixed, the number of bats in the roost  $N_b$  will still vary upon  
145 each simulation because the Poisson point process is stochastic.

146 Bat movement was modeled at the individual-level and roost-level. To model individual-  
147 level movement, we calculated a kernel density estimate for the simulated point process  
148 that sums Gaussian kernels with a radius of 0.5m centered on each bat position. We  
149 modeled roost-wide movement with a spatial Gompertz probability density using the  
150 `dgompertz` function from the `flexsurv` package (Jackson 2014). The distribution  
151 of the Gompertz is controlled by shape and rate parameters that determine the function's  
152 curvature and rate of decay respectively. We chose ranges for these parameters that  
153 make the least assumptions about movement, where values are high for a large area at  
154 the roost's center, but decay quickly toward the edges. To make the final kernel density  
155 estimate for bat density, we combined models of individual- and roost-level movement  
156 and ensured that the function integrated to 1 (Figure 1).

## 157 **Modeling under-roost sheet sampling**

158 We explored the effect of four different under-roost sheet sampling designs: quadrant,  
159 uniform, stratified, and random. An efficient way to simulate each sampling design  
160 within two-dimensional circular space uses hexagonal tiles, where the size and combi-  
161 nation of tiles selected can replicate different sheet-based sampling designs. We calcu-  
162 lated the number of bats roosting and moving above a sampling sheet by using the area  
163 of each hexagonal polygon to define the space of integration  $S$ .

164 We determined the dimensions for the quadrant-based design using common proto-  
165 cols for under-roost sheet sampling of Australian fruit bats found in Edson et al. (2015a)  
166 and Field et al. (2015). Here, 10 large  $3.6 \times 2.6$ m sheets were placed under the roost  
167 and divided into  $1.8 \times 1.3$ m quadrants, where urine samples were pooled within each  
168 quadrant (allowing up to 4 samples per large sheet). Considering each quadrant to be  
169 its own ‘sheet’, we replicated this sampling design by making a hexagonal grid with  
170 each tile area equivalent to a  $1.8 \times 1.3$ m rectangular sheet. Groupings of 4 hexagonal  
171 tiles then suffice as a large sheet with 4 quadrants. In each simulation, we generated  
172 10 sheet positions within  $A$  using a simple sequential inhibition point process with the  
173 `rSSI` function of the `spatstat` package (Baddeley et al. 2015). To ensure that all  
174 sheets retained the same quadrant orientation and that no two sheets were directly adja-  
175 cent, we generated sheet positions within a disc of  $A - 3$ m and set the inhibitory radius  
176 to  $3s$ , where  $s$  is the hexagonal cell size. The four cell-centers nearest each of the 10  
177 simulated point locations comprised the 40 ( $10 \times 4$  quadrants) hexagonal tiles for the  
178 quadrant-based design (S1).

179 To test our hypothesis that a larger number of smaller sheets will estimate roost-level  
180 prevalence more accurately, we generated hexagonal grids with cell size  $s$  that select  $h$   
181 number of tiles in a uniform, stratified, or random pattern. Both uniform and random  
182 designs are straightforward, but the stratified sampling design was generated using a  
183 sequential inhibition point process, where random points are laid down sequentially, re-  
184 taining only those that are placed further than a specified inhibitory radius  $r_s$ . This is  
185 similar to a person attempting to lay down sheets randomly with one rule in mind—“Do  
186 not place sheets within  $r_s$  distance of each other”. We simulated sheet sampling designs  
187 with the `sheetsamp` function in the R code provided in Supplementary Information.  
188 Figure 2 displays an example of a simulation which has generated the previously imple-

189 mented large-sheet quadrant design and three additional ‘small-sheet’ designs that use  
190 a larger number of smaller ( $1 \times 1$  m) more dispersed sheets.

### 191 **Calculating estimated prevalence**

192 Given a roost area  $A$ , the polygons produced by the `sheetsamp` function (described  
193 above) generate the sheet sampling area  $S$ , so that  $S \subset A$ , and  $S_h = \{S_1, S_2, \dots, S_H\}$ ,  
194 where  $H$  is the total number of sampling sheets. We derived bat density from a simu-  
195 lated Poisson cluster point process and then estimated its intensity function  $\lambda(x)$  for area  
196  $A$ . This method uses kernel density as an unbiased estimator of  $\lambda(x)$ , which includes  
197 clustering of bats around trees, individual-level movement within the tree canopy, and  
198 roost-level movement to render  $\tilde{\lambda}(x)$ . The expected number of bats roosting and moving  
199 above a specific sheet  $S_h$  placed at position  $(x_h, y_h)$  is the integral of the estimated in-  
200 tensity function  $\tilde{\lambda}(x)$  over the sheet area multiplied by the number of bats  $N_b$  generated  
201 by the stochastic point process.

$$E[N(S_h)] = \int_{S_h} N_b \tilde{\lambda}(x) dx \quad (1)$$

202 Bats in the upper strata of the canopy are less likely to contribute urine to the sheet  
203 below because of obstruction by individuals below or factors in the environment (e.g  
204 wind, tree branches). Therefore, a urine sample is collected from each of the sheets  $S$   
205 according to a probability of urine contribution and collection  $p_u$ , with variation given  
206 by  $N(p_u, \sigma^2)$ . The number of individuals contributing to each pooled sample  $C_b$  is  
207 calculated as

$$C_b = \int_{S_h} p_u N_b \tilde{\lambda}(x) dx, \quad (2)$$

208 where  $C_b$  is a vector of length  $H$ , containing the number of contributing bats per sheet.

209 Assuming heterogeneous prevalence within the roost, the number of infected bats  
210  $D_b$  in the sample is the sum of  $C_b$  independent Bernoulli trials with success probability  
211 equal to the true prevalence  $p$ .

$$D_b = \sum_{i=1}^{C_b} \left[ \text{Bin}(1, p) \right]_i \quad (3)$$



212 Given the number of infected bats  $D_b$  and the probability of urine collection  $p_u$ , we  
213 can calculate the probability of obtaining a negative sheet as  $(1 - p_u)^{D_b}$ . Assuming that  
214 urine contribution from one infected bat is sufficient to make a sheet sample positive,  
215 the infection status of all sheets is a binary vector  $I_h$  indicating the positivity for the  $H$   
216 sheets of  $S$ .

$$I_h = \begin{cases} 0, & \text{if } D_b = 0 \\ 1, & \text{if } D_b \geq 1 \end{cases} \quad (4)$$

217 To calculate estimated sheet-level prevalence  $\hat{p}$ , the number of positive sheets  $\sum_{h=1}^H I_h$   
218 is divided by the number of urine samples collected at the roost  $n_s$ , which is the sum  
219 of a binary vector indicating that the urine of more than one individual was contributed  
220 and collected for all of the  $H$  sheets of  $S$ .

$$\hat{p} = \frac{\sum_{h=1}^H I_h}{n_s}, \quad (5)$$

221 where

$$n_s = \sum_{h=1}^H [C_b \geq 1]_h. \quad (6)$$

## 222 Simulation scenarios

223 Each simulated iteration generates an estimated intensity function for bat density and  
224 then performs under-roost sampling using each of the four sampling designs. There-  
225 fore, each sampling design is tested using the same set of bat density functions, facili-  
226 tating comparison. Parameters for sheet size  $s$  and number of sheets  $H$  were fixed for  
227 the quadrant-based design to replicate the previously implemented field methods de-  
228 scribed above. Parameters controlling sampling dimensions for the three small-sheet  
229 designs were either fixed or varied over a range of interest depending on the question  
230 the scenario was meant to address. A list of parameter values used in each scenario can  
231 be found in Table 1. For each iteration we calculated estimated prevalence (described  
232 above), along with additional analytic metrics such as the probability of obtaining a  
233 negative sheet  $(1 - p_u)^{D_b}$ , the occurrence of a false negative ( $\hat{p}_i = 0 | p_i > 0$ ), Moran's I

234 among sheets (Getis 1995), and the Clark-Evans R clustering coefficient for individual  
235 bat roosting positions (Clark and Evans 1954).

236 In the first two scenarios we explored local sensitivity between estimated prevalence  
237 and some possible confounders and sources of bias, with values of most parameters  
238 fixed. To perform a simple comparison between the four under-roost sheet sampling  
239 methods, we fixed all values of bat density and movement to simulate a roost with a  
240 30m radius and a mean number of 5000 individuals (see scenario 1 in Table 1). We per-  
241 formed 1000 simulations with true prevalence  $p$  set at a plausible value of 0.1. Estimated  
242 prevalence values were plotted, along with the probability of obtaining a negative sheet  
243 for each sampling design. To explore estimation bias over all values of true prevalence,  
244 we kept parameter values the same as simulation 1, but we allowed true prevalence to  
245 vary from 0 to 1, and then plotted true versus estimated prevalence along with mean  
246 estimation bias (scenario 2 in Table 1).

247 In scenarios 3 and 4, we used global sensitivity analysis, as described in Prowse  
248 et al. (2016), to identify the main sources of estimation bias and determine the optimal  
249 application of under-roost sheet sampling. Here, we performed a large number of simu-  
250 lations ( $n_{sim} = 10000$ ), and allowed parameter values for each simulation to vary using  
251 latin hypercube sampling. We then analyzed the output using boosted regression trees  
252 (BRTs; De'ath 2007, Elith et al. 2008) as an emulator to link simulation inputs (varied  
253 parameters) with simulation outputs (we used estimation bias and false negative rate as  
254 responses). Parameter values were determined using the `randomLHS` function in the  
255 `lhs` package (Carnell 2016), and BRTs were fitted using the `gbm.step` function and  
256 the `gbm` and `dismo` packages (Hijmans et al. 2016, Ridgeway 2016). BRTs were fitted  
257 with appropriate error structure (Gaussian or Binomial) and meta-parameters set to en-  
258 sure that the number of fitted trees exceeded 1000, following Elith et al. (2008), with tree  
259 complexity, learning rate, bagging fraction, and number of cross validation folds set to:  
260 4, 0.005, 0.7, and 10 respectively. BRTs act as an effective emulator here because they  
261 fit complex non-linear relationships with up to third order interactions (tree complex-  
262 ity=4) among model parameters. Relative variable influence and individual response  
263 curves for each variable further allow general description of how sensitive estimation  
264 bias is to each parameter.

265 In scenario 3, we compare the quadrant-based design with the stratified design while  
266 accounting for the variability in all other parameters to determine the main drivers caus-

267 ing differences in estimation bias. We chose to use only the stratified design as a candi-  
268 date small-sheet design because the first two simulations suggested that the three small-  
269 sheet designs produce similar results, and the stratified design is most plausibly repli-  
270 cated in the field. Based on preliminary models, it appeared that a small-sheet sampling  
271 design which used  $\sim 100$  sheets with an area of  $\leq 1 \times 1\text{m}^2$  could attain low estimation  
272 bias. So, we fixed the parameters controlling sheet dimensions accordingly to facilitate  
273 comparison between the quadrant and stratified methods (see simulation 3 in Table 1).

274 To explore the optimal application of the stratified sampling design, we performed  
275 a global sensitivity analysis using only the stratified sampling design in scenario 4. All  
276 parameters were varied as in scenario 3, however sheet area  $s$ , number of sheets  $H$ ,  
277 and distance between sheets ( $d_s$ ; previously fixed at 2m) were also varied over intervals  
278 of interest (scenario 4 in Table 1). We used a latin hypercube to sample the parameter  
279 space, and then fitted two BRT models using the variables that control the sheet sam-  
280 pling design as predictors (i.e. sheet area, number of sheets, distance between sheets,  
281 and number of samples). The first model we fitted with Gaussian error and estimation  
282 bias as the response, and the second with Binomial error and a binary response indicat-  
283 ing occurrence of a false negative prediction for viral presence.

## 284 Results

285 When we compared the quadrant-based sheet design to the small-sheet designs with  
286 fixed model parameters (scenario 1 in Table 1), we found that at a low value of true  
287 prevalence (0.1) the quadrant design exhibited strong positive bias and all three small-  
288 sheet designs produced similar estimates close to the fixed value of true prevalence (see  
289 top row of Figure 3). The differences in estimated values can be partially attributed to  
290 the increased number of bats that roost and move above the larger sheets, which de-  
291 crease the probability of obtaining a negative sheet (see bottom row of Figure 3). Local  
292 sensitivity analysis revealed that, at a low value of true prevalence, prevalence estima-  
293 tion for the quadrant-based design is sensitive to spatial auto-correlation among sheets  
294 (Moran's I) and clustering of bat roosting positions (Clark-Evans R) (Figures S2 and  
295 S3). However, the small-sheet designs are sensitive to the number of bats in the roost  
296 ( $N_b$ ) (Figure S4). This indicates that, at low values of individual-level prevalence, the  
297 quadrant based method remains sensitive to viral presence regardless of the roost popu-

298 lation size, but will tend to over-estimate viral prevalence due to the spatial clustering of  
299 individuals common to most tree roosting bats. Conversely, small-sheet methods appear  
300 less affected by clustering and spatial auto-correlation among sheets, but they are likely  
301 to be less sensitive to viral presence at low population sizes.

302 In scenario 2, where we allowed true prevalence to vary between 0 and 1 (Table 1),  
303 we found that the quadrant design had 5–7 times the positive bias as the small-sheet  
304 designs. The mean estimation bias was 0.21 for the quadrant design, and 0.4, 0.3, and  
305 0.4 for the uniform, stratified, and random designs respectively. This suggests that, for a  
306 roost size of 3000–8000, the estimation bias will consistently be greater for the quadrant  
307 design, especially for intermediate values of individual-level prevalence. Additionally,  
308 the similarity among the uniform, stratified, and random designs indicates that the exact  
309 spatial pattern of the small-sheet method is not important—estimation bias is improved  
310 by reducing sheet size, increasing the number of sheets, and spreading sheets out within  
311 the roost area.

312 Scenario 3 showed significant differences in estimation bias between quadrant and  
313 stratified designs, even when we allowed all parameters to vary (Figure 5e). Summary  
314 of simulation output with the BRT emulator showed higher bias for the quadrant de-  
315 sign, which is most strongly influenced by the total number of individual bats sampled  
316 across all sheets ( $\sum C_b$ ; Figures 5a and b). This suggests that the larger sheet area in  
317 the quadrant design allows pooling of urine samples from more individuals, making the  
318 prevalence estimates more sensitive to increases in population size. Further, a quadrant-  
319 based design allows up to four ‘independent’ pooled samples to be adjacent each other,  
320 effectively inflating the number of positive sheets, illustrated by higher estimated preva-  
321 lence associated with high values of Moran’s I in Figure 5d. In general, both sampling  
322 designs are positively influenced by intermediate values of true prevalence, number of  
323 bats in the roost (leading to a greater number of total bats contributing to each sample),  
324 and spatial auto-correlation among sheets. However, the influence of these factors is  
325 diminished in the stratified design, as shown by the orange points in Figures 5b–f.

326 When we further explored the influence of sheet dimensions for the stratified design  
327 (scenario 4 in Table 1), we found that sheet area  $s$  and number of samples collected  $n_s$   
328 influenced estimation bias and probability of false negatives the most, and the number  
329 of sheets  $H$  and distance between sheets  $d_s$  had less influence (Figure 6). Specifically,  
330 estimation bias increases for sheet area greater than  $0.5\text{m}^2$ , but the probability of false

331 negatives increases for sheet area less than  $0.75\text{m}^2$ . Suggesting that sheet areas in the  
332 range of  $0.5\text{--}1\text{m}^2$  would provide a balance of the two sources of sampling bias (Fig-  
333 ures 6a and e). The number of sheets had no influence on estimation bias, however,  
334 sampling designs with less than 80 sheets had higher probability of false negatives (Fig-  
335 ures 6b and f). Minimum distance between sheets did not have a significant effect on  
336 either source of sampling bias, however, distances between 2–3m fitted the lowest maxi-  
337 mum probability of false negatives (Figures 6b and f). The number of samples collected  
338  $n_s$  exhibited the largest influence among sheet dimension parameters. Estimation bias  
339 increased with a larger number of collected samples, with the possibility for under-  
340 estimation when under 20 samples were obtained (Figure 6d), and the probability of  
341 false negatives increased below 30–40 samples (Figure 6h). In general, these results in-  
342 dicate that collecting 30–40 pooled urine samples with a stratified sheet sampling design  
343 that uses 80–100 sheets, each with an area of  $0.5\text{--}1\text{m}^2$ , that are separated by a minimum  
344 distance of 2–3m, would provide optimal application of the under-roost sampling tech-  
345 nique that minimizes error introduced by estimation bias and false negatives. Further,  
346 we calculated the proportion of simulations matching the parameters stated above and  
347 found that, given a roost population size greater than 5000, 89% of simulations had  
348 at least 30 sheets that collected a urine sample, and 64% collected at least 40 samples  
349 (Figure S5).

## 350 Discussion

351 Under-roost sampling of bat viruses has been employed previously in Africa, Asia, and  
352 Australia, however little attention has been given to the effects of sampling bias or op-  
353 timization of sampling designs. We present the first modeling study to theoretically in-  
354 vestigate under-roost sampling in detail. The simulation scenarios we developed enable  
355 inference on the relationship between individual-level prevalence and roost-level preva-  
356 lence estimated for a generic population of tree roosting bats. Specifically, our results  
357 provide three key insights that will help to refine the application of under-roost sampling  
358 in the surveillance of infectious viruses in wild bat populations. First, sampling designs  
359 which use large sheets (larger than  $\sim 1\text{m}^2$ ), and/or sheet-quadrants to pool urine sam-  
360 ples are sensitive to viral presence, but they potentially over-estimate viral prevalence  
361 with a bias up to 7 times greater than a design with a greater number of smaller sam-

362 pling sheets (Figure 4). Second, estimation bias is affected by the number of individuals  
363 allowed to contribute to a pooled sample and spatial auto-correlation among sampling  
364 sheets, however these sources of bias can be reduced by adjusting the sheet sampling  
365 design (Figure 5). And third, assuming a roost population size of over 5000, estima-  
366 tion bias can be sufficiently reduced by collecting 30–40 pooled urine samples using a  
367 stratified sheet sampling design that uses 80–100 sheets, each with an area of  $0.75\text{--}1\text{m}^2$ ,  
368 that are separated by 1–3m (Figures 6 and S5). Our insights from simulation models  
369 provide well-informed hypotheses about the optimal sheet design for under-roost sam-  
370 pling, which facilitates further development within a model-guided fieldwork approach  
371 (Restif et al. 2012).

372 Our recommendations to optimize under-roost sampling differ from those previously  
373 implemented in the field in that they reduce the size of sheet area, increase the number  
374 of sheets, and disperse them about the roost area. In relation to the best-described meth-  
375 ods in the literature, this is roughly equivalent to halving the size of sheet quadrants in  
376 Edson et al. (2015a) and Field et al. (2015) to make 80  $0.9 \times 0.8\text{m}$  sheets, and then sep-  
377 arating each of them by 1–3m. Or relative to Wacharapluesadee et al. (2010), the sheets  
378 could remain  $1.5 \times 1.5\text{m}$  (or be reduced to  $1 \times 1\text{m}$ ), but the total number of sheets could  
379 be increased by 3–4 times. However, we acknowledge that our recommendations are  
380 derived from simulation models that generalize a broad array of roost areas and popula-  
381 tion sizes that do not take into account local topography around a roost. Local factors at  
382 the roosting site (e.g. physical obstructions, understory vegetation, slope) must be con-  
383 sidered when applying sampling designs in the field. Further, ‘optimal’ application of  
384 an under-roost sampling design is still inherently limited to pooled sheet-level estimates  
385 of prevalence. As our results show, this makes it difficult to entirely remove positive  
386 bias associated with such data aggregation, however it can be mitigated with a sheet  
387 design that reduces the area of urine pooling and limits spatial auto-correlation among  
388 sheets.

389 We hypothesize that under-roost sampling designs as they have been applied in the  
390 past are poorly suited to studying viral dynamics because of positive sampling bias. For  
391 example, Páez et al. (2017) analyzed data from an under-roost sampling study (Field  
392 et al. 2015), and noted that a large amount of variation in viral prevalence was explained  
393 by differences in sampling sheets, indicating that population structure within roosts or  
394 sampling bias may have introduced additional variation in estimated prevalence. In light

395 of the results from our simulation models, pooling urine samples drawn from large sheet  
396 areas effectively inflates the number of Bernoulli trials in each Binomial sample. This  
397 may be observed as overestimation when the pooled samples are subsequently used to  
398 calculate prevalence in such studies. Therefore, collecting pooled urine samples from  
399 a smaller sheet area may reduce the number of bats contributing to a sample and the  
400 potential for overestimation, with the caveat that smaller sheets are less likely to collect  
401 urine samples, necessitating a larger number of sheets placed under the roost.

402 We have shown that sheet design in under-roost sampling can have a significant  
403 impact on both the estimation of viral prevalence and the false negative rate when deter-  
404 mining viral presence. The sampling design employed, therefore, depends on the aim of  
405 the study, because viral discovery and studies on dynamics require different approaches.  
406 Research focusing on viral discovery requires field methods that reduce the probability  
407 of a false negative in regard to viral presence (sensitivity). Studies on dynamics must  
408 estimate prevalence with low bias, requiring samples that are accurately classified as  
409 present and absent (specificity). Further, the volume of urine sample required by the  
410 diagnostic test will determine how large the sheet area must be when pooling urine  
411 samples. For instance, if you are only interested in the presence or absence of viral  
412 RNA in a sample, RT-PCR requires a mere 50-150 $\mu$ L sample, allowing a few droplets  
413 from a rather contained area to be taken. If however, a larger volume is required for se-  
414 quencing or multiple assays, then up to 1–2mL may be required, necessitating a larger  
415 pooled sample from a greater area that is more susceptible to bias associated with data  
416 aggregation (Robinson 2009). Therefore, if a study includes multiple aims, an efficient  
417 adaptation of a small-sheet design includes pooling urine over multiple spatial scales,  
418 with samples pooled over a large area to test for viral presence with high sensitivity *and*  
419 samples pooled over a small area for estimating individual-level prevalence with high  
420 specificity. For example, a researcher might put down 100 1  $\times$  1m sheets, and collect 40  
421 100  $\mu$ L small pooled samples from 30–40 separate sheets. The remaining urine can be  
422 pooled across multiple sheets to form larger pooled samples that provide higher sensitiv-  
423 ity to viral presence. This approach is similar to the aforementioned herd-level testing in  
424 veterinary epidemiology (Christensen and Gardner 2000), where a herd of livestock is  
425 first tested by pooling multiple samples as a low-cost test with high sensitivity. If virus  
426 is found in the large-scale pooled samples, then many the small-scale pooled samples  
427 can be used to accurately estimate prevalence.

428 Our simulation models and recommendations for a small-sheet sampling design pro-  
429 vide an important contribution that facilitates future research. Specifically, we propose  
430 that under-roost sampling can be further developed with two important avenues of re-  
431 search: i) a comparative field study to quantify differences in sheet sampling designs in  
432 a model-guided field work approach (Restif et al. 2012), and ii) modeling studies that  
433 incorporate previous work on estimating individual-level prevalence from pooled sam-  
434 ples (Cowling et al. 1999, Hauck 1991) to investigate bias correction for existing and  
435 future field data. Given the challenges associated with under-roost sampling, it remains  
436 an attractive supplement to catching and sampling individual bats. If applied in a man-  
437 ner suited for study aims, it can achieve longitudinal sampling of a bat population at the  
438 roost-scale that is both cost effective and reduces exposure to infectious viruses. Further  
439 development of the sampling technique into a replicable sampling method is also advan-  
440 tageous, because it enables population level surveillance of infectious viruses in bats,  
441 which provide insights into ecological processes that drive spillover and emergence of  
442 bat-borne viruses over large spatial scales.

## 443 **Acknowledgments**

444 JRG conducted the research with support from an Australian Government Research  
445 Training Program Scholarship.



## 446 **References**

- 447 Amman, B. R. et al. (2012) Seasonal Pulses of Marburg Virus Circulation in Juvenile  
448 *Rousettus aegyptiacus* Bats Coincide with Periods of Increased Risk of Human In-  
449 fection. *PLOS Pathogens*, **8**, 1–11.
- 450 Anthony, S. J. et al. (2013) A Strategy To Estimate Unknown Viral Diversity in Mam-  
451 mals. *mBio*, **4**, e00598–13.
- 452 Baddeley, A., E. Rubak, and R. Turner (2015) *Spatial Point Patterns: Methodology and*  
453 *Applications with R*. CRC Press.
- 454 Baker, K. S., S. Todd, G. Marsh, A. Fernandez-Loras, R. Suu-Ire, J. L. N. Wood,  
455 L. F. Wang, P. R. Murcia, and A. A. Cunningham (2012) Co-circulation of diverse  
456 paramyxoviruses in an urban African fruit bat population. *Journal of General Virol-*  
457 *ogy*, **93**, 850–856.
- 458 Baker, K. S., R. M. Leggett, N. H. Bexfield, M. Alston, G. Daly, S. Todd, M. Tached-  
459 jian, C. E. Holmes, S. Cramer, L.-F. Wang, J. L. Heeney, R. Suu-Ire, P. Kellam,  
460 A. A. Cunningham, J. L. Wood, M. Caccamo, and P. R. Murcia (2013) Metagenomic  
461 study of the viruses of African straw-coloured fruit bats: Detection of a chiropteran  
462 poxvirus and isolation of a novel adenovirus. *Virology*, **441**, 95–106.
- 463 Behets, F., S. Bertozzi, M. Kasali, M. Kashamuka, L. Atikala, C. Brown, R. W. Ryder,  
464 T. C. Quinn, and D. Olsen (1990) Successful use of pooled sera to determine HIV-1  
465 seroprevalence in Zaire with development of cost-efficiency models. *AIDS*, **4**, 737–  
466 741.
- 467 Breman, J. G., K. M. Johnson, G. v. d. Groen, C. B. Robbins, M. V. Szczeniowski, K.  
468 Ruti, P. A. Webb, F. Meier, D. L. Heymann, and E. V. S. Teams (1999) A Search for  
469 Ebola Virus in Animals in the Democratic Republic of the Congo and Cameroon:  
470 Ecologic, Virologic, and Serologic Surveys, 1979–1980. *Journal of Infectious Dis-*  
471 *eases*, **179**, 139–147.
- 472 Calisher, C. H., J. E. Childs, H. E. Field, K. V. Holmes, and T. Schountz (2006) Bats:  
473 Important Reservoir Hosts of Emerging Viruses. *Clinical Microbiology Reviews*, **19**,  
474 531–545.
- 475 Carnell, R. (2016) lhs: Latin Hypercube Samples, R package version 0.14.

- 476 Christensen, J. and I. A. Gardner (2000) Herd-level interpretation of test results for  
477 epidemiologic studies of animal diseases. *Preventive Veterinary Medicine*, **45**, 83–  
478 106.
- 479 Chua, K. B. (2003) A novel approach for collecting samples from fruit bats for isolation  
480 of infectious agents. *Microbes and Infection*, **5**, 487–490.
- 481 Chua, K. B., C. Lek Koh, P. S. Hooi, K. F. Wee, J. H. Khong, B. H. Chua, Y. P. Chan,  
482 M. E. Lim, and S. K. Lam (2002) Isolation of Nipah virus from Malaysian Island  
483 flying-foxes. *Microbes and Infection*, **4**, 145–151.
- 484 Chua, K. B., L. F. Wang, S. K. Lam, G. Cramer, M. Yu, T. Wise, D. Boyle, A. D. Hyatt,  
485 and B. T. Eaton (2001) Tioman Virus, a Novel Paramyxovirus Isolated from Fruit  
486 Bats in Malaysia. *Virology*, **283**, 215–229.
- 487 Clark, P. J. and F. C. Evans (1954) Distance to Nearest Neighbor as a Measure of Spatial  
488 Relationships in Populations. *Ecology*, **35**, 445–453.
- 489 Cowling, D. W., I. A. Gardner, and W. O. Johnson (1999) Comparison of methods  
490 for estimation of individual-level prevalence based on pooled samples. *Preventive  
491 Veterinary Medicine*, **39**, 211–225.
- 492 De’ath, G. (2007) Boosted trees for ecological modeling and prediction. *Ecology*, **88**,  
493 243–251.
- 494 Dorfman, R. (1943) The detection of defective members of large populations. *The An-  
495 nals of Mathematical Statistics*, **14**, 436–440.
- 496 Drexler, J. F. et al. (2012) Bats host major mammalian paramyxoviruses. *Nature Com-  
497 munications*, **3**, 796.
- 498 Edson, D., H. Field, L. McMichael, D. Jordan, N. Kung, D. Mayer, and C. Smith (2015a)  
499 Flying-Fox Roost Disturbance and Hendra Virus Spillover Risk. *PLoS ONE*, **10**,  
500 e0125881.
- 501 Edson, D., H. Field, L. McMichael, M. Vidgen, L. Goldspink, A. Broos, D. Melville,  
502 J. Kristoffersen, C. de Jong, A. McLaughlin, R. Davis, N. Kung, D. Jordan, P. Kirk-  
503 land, and C. Smith (2015b) Routes of Hendra Virus Excretion in Naturally-Infected  
504 Flying-Foxes: Implications for Viral Transmission and Spillover Risk. *PLoS ONE*,  
505 **10**, e0140670.
- 506 Elith, J., J. R. Leathwick, and T. Hastie (2008) A working guide to boosted regression  
507 trees. *Journal of Animal Ecology*, **77**, 802–813.

- 508 Field, H., C. de Jong, D. Melville, C. Smith, I. Smith, A. Broos, Y. H. ( Kung, A.  
509 McLaughlin, and A. Zeddeman (2011) Hendra Virus Infection Dynamics in Aus-  
510 tralian Fruit Bats. *PLoS ONE*, **6**, e28678.
- 511 Field, H., D. Jordan, D. Edson, S. Morris, D. Melville, K. Parry-Jones, A. Broos, A.  
512 Divljan, L. McMichael, R. Davis, N. Kung, P. Kirkland, and C. Smith (2015) Spa-  
513 tiotemporal Aspects of Hendra Virus Infection in Pteropid Bats (Flying-Foxes) in  
514 Eastern Australia. *PLoS ONE*, **10**, e0144055.
- 515 Getis, A. (1995) Classics in human geography revisited: Cliff, A.D. and Ord, J.K. 1973:  
516 Spatial autocorrelation. *Progress in Human Geography*, **19**, 245–249.
- 517 Halpin, K., A. D. Hyatt, R. K. Plowright, J. H. Epstein, P. Daszak, H. E. Field, L. Wang,  
518 P. W. Daniels, and Henipavirus Ecology Research Group (2007) Emerging Viruses:  
519 Coming in on a Wrinkled Wing and a Prayer. *Clinical Infectious Diseases*, **44**, 711–  
520 717.
- 521 Halpin, K., P. L. Young, H. E. Field, and J. S. Mackenzie (2000) Isolation of Hendra  
522 virus from pteropid bats: a natural reservoir of Hendra virus. *Journal of General*  
523 *Virology*, **81**, 1927–1932.
- 524 Hauck, W. W. (1991) Confidence intervals for seroprevalence determined from pooled  
525 sera. *Annals of Epidemiology*, **1**, 277–281.
- 526 Hayman, D. T. S., R. A. Bowen, P. M. Cryan, G. F. McCracken, T. J. O’Shea, A. J. Peel,  
527 A. Gilbert, C. T. Webb, and J. L. N. Wood (2013) Ecology of Zoonotic Infectious  
528 Diseases in Bats: Current Knowledge and Future Directions. *Zoonoses and Public*  
529 *Health*, **60**, 2–21.
- 530 Hayman, D. T. S., R. McCrea, O. Restif, R. Suu-Ire, A. R. Fooks, J. L. N. Wood, A. A.  
531 Cunningham, and J. M. Rowcliffe (2012) Demography of straw-colored fruit bats in  
532 Ghana. *Journal of Mammalogy*, **93**, 1393–1404.
- 533 Hijmans, R. J., J. Leathwick, and J. Elith (2016) dismo: Species Distribution Modeling,  
534 R package version 1.1.1.
- 535 Iehlé, C., G. Razafitrimo, J. Razainirina, S. M. Goodman, C. Faure, M.-C. Georges-  
536 Courbot, D. Rousset, and J.-M. Reynes (2007) Henipavirus and Tioman Virus Anti-  
537 bodies in Pteropodid Bats, Madagascar. *Emerging Infectious Disease*, **13**, 159.
- 538 Jackson, C. (2014) flexsurv: Flexible parametric survival and multi-state models, R  
539 package version 0.5.

- 540 Jayme, S. I. et al. (2015) Molecular evidence of Ebola Reston virus infection in Philip-  
541 pine bats. *Virology Journal*, **12**.
- 542 Li, W., Z. Shi, M. Yu, W. Ren, C. Smith, J. H. Epstein, H. Wang, G. Crameri, Z. Hu,  
543 H. Zhang, J. Zhang, J. McEachern, H. Field, P. Daszak, B. T. Eaton, S. Zhang,  
544 and L.-F. Wang (2005) Bats Are Natural Reservoirs of SARS-Like Coronaviruses.  
545 *Science*, **310**, 676–679.
- 546 Litvak, E., X. M. Tu, and M. Pagano (1994) Screening for the Presence of a Disease  
547 by Pooling Sera Samples. *Journal of the American Statistical Association*, **89**, 424–  
548 434.
- 549 Marsh, G. A., C. d. Jong, J. A. Barr, M. Tachedjian, C. Smith, D. Middleton, M. Yu, S.  
550 Todd, A. J. Foord, V. Haring, J. Payne, R. Robinson, I. Broz, G. Crameri, H. E. Field,  
551 and L. F. Wang (2012) Cedar Virus: A Novel Henipavirus Isolated from Australian  
552 Bats. *PLOS Pathogens*, **8**, e1002836.
- 553 Middleton, D., C. Morrissy, B. van der Heide, G. Russell, M. Braun, H. Westbury, K.  
554 Halpin, and P. Daniels (2007) Experimental Nipah Virus Infection in Pteropid Bats  
555 (*Pteropus poliocephalus*). *Journal of Comparative Pathology*, **136**, 266–272.
- 556 Muñoz-Zanzi, C., M. Thurmond, S. Hietala, and W. Johnson (2006) Factors affecting  
557 sensitivity and specificity of pooled-sample testing for diagnosis of low prevalence  
558 infections. *Preventive Veterinary Medicine*, **74**, 309–322.
- 559 Nychka, D., R. Furrer, J. Paige, and S. Sain (2015) fields: Tools for spatial data, R  
560 package version 8.10.
- 561 Páez, D. J., J. R. Giles, H. McCallum, H. Field, D. Jordan, A. J. Peel, and R. K. Plowright  
562 (2017) Conditions Affecting the Timing and Magnitude of Hendra Virus Shedding  
563 Across Pteropid Bat Populations in Australia. *Epidemiology and Infection*, In revi-  
564 sion.
- 565 Plowright, R. K. et al. (2015) Ecological dynamics of emerging bat virus spillover.  
566 *Proceedings of the Royal Society of London B: Biological Sciences*, **282**.
- 567 Pritchard, L. I., K. B. Chua, D. Cummins, A. Hyatt, G. Crameri, B. T. Eaton, and L.  
568 Wang (2006) Pulau virus; a new member of the Nelson Bay orthoreovirus species  
569 isolated from fruit bats in Malaysia. *Archives of Virology*, **151**, 229–239.
- 570 Prowse, T. A. A., C. J. A. Bradshaw, S. Delean, P. Cassey, R. C. Lacy, K. Wells, M. E.  
571 Aiello-Lammens, H. R. Akçakaya, and B. W. Brook (2016) An efficient protocol for  
572 the global sensitivity analysis of stochastic ecological models. *Ecosphere*, **7**, e01238.

- 573 Quan, P. L. et al. (2013) Bats are a major natural reservoir for hepaciviruses and pe-  
574 giviruses. *Proceedings of the National Academy of Sciences*, **110**, 8194–8199.
- 575 R Core Team (2016) R: A Language and Environment for Statistical Computing, [http://www.R-](http://www.R-project.org/)  
576 [project.org/](http://www.R-project.org/).
- 577 Restif, O., D. T. S. Hayman, J. R. C. Pulliam, R. K. Plowright, D. B. George, A. D. Luis,  
578 A. A. Cunningham, R. A. Bowen, A. R. Fooks, T. J. O’Shea, J. L. N. Wood, and C. T.  
579 Webb (2012) Model-guided fieldwork: practical guidelines for multidisciplinary re-  
580 search on wildlife ecological and epidemiological dynamics. *Ecology Letters*, **15**,  
581 1083–1094.
- 582 Ridgeway, G. (2016) gbm: Generalized Boosted Regression Models, R package version  
583 2.1.1.
- 584 Robinson, W. S. (2009) Ecological Correlations and the Behavior of Individuals. *Inter-*  
585 *national Journal of Epidemiology*, **38**, 337–341.
- 586 Smith, I., A. Broos, C. d. Jong, A. Zeddeman, C. Smith, G. Smith, F. Moore, J. Barr,  
587 G. Cramer, G. Marsh, M. Tachedjian, M. Yu, Y. H. Kung, L.-F. Wang, and H. Field  
588 (2011) Identifying Hendra Virus Diversity in Pteropid Bats. *PLOS ONE*, **6**, e25275.
- 589 Smith, I. and L.-F. Wang (2013) Bats and their virome: an important source of emerging  
590 viruses capable of infecting humans. *Current Opinion in Virology*, **3**, 84–91.
- 591 Streicker, D. G., S. Recuenco, W. Valderrama, J. Gomez Benavides, I. Vargas, V. Pacheco,  
592 R. E. Condori Condori, J. Montgomery, C. E. Rupprecht, P. Rohani, and S. Altizer  
593 (2012) Ecological and anthropogenic drivers of rabies exposure in vampire bats:  
594 implications for transmission and control. *Proceedings of the Royal Society B: Bio-*  
595 *logical Sciences*, **279**, 3384–3392.
- 596 Towner, J. S. et al. (2009) Isolation of Genetically Diverse Marburg Viruses from Eryp-  
597 tian Fruit Bats. *PLoS Pathogens*, **5**, e1000536.
- 598 Wacharapluesadee, S., K. Boongird, S. Wanghongsa, N. Ratanasetyuth, P. Supavon-  
599 wong, D. Saengsen, G. N. Gongal, and T. Hemachudha (2010) A longitudinal study  
600 of the prevalence of Nipah virus in *Pteropus lylei* bats in Thailand: evidence for sea-  
601 sonal preference in disease transmission. *Vector-Borne and Zoonotic Diseases*, **10**,  
602 183–190.
- 603 Wacharapluesadee, S., B. Lumlertdacha, K. Boongird, S. Wanghongsa, L. Chanhom, P.  
604 Rollin, P. Stockton, C. E. Rupprecht, T. G. Ksiazek, and T. Hemachudha (2005)  
605 Bat Nipah Virus, Thailand. *Emerging Infectious Disease*, **11** (12), 1949.

- 606 Wang, L.-F. and C. Cowled (2015) *Bats and Viruses: A New Frontier of Emerging In-*  
607 *fectious Diseases*. John Wiley & Sons.
- 608 Wood, J. L. N., M. Leach, L. Waldman, H. MacGregor, A. R. Fooks, K. E. Jones, O. Res-  
609 tif, D. Dechmann, D. T. S. Hayman, K. S. Baker, A. J. Peel, A. O. Kamins, J. Fahr,  
610 Y. Ntiamoa-Baidu, R. Suu-Ire, R. F. Breiman, J. H. Epstein, H. E. Field, and A. A.  
611 Cunningham (2012) A framework for the study of zoonotic disease emergence and  
612 its drivers: spillover of bat pathogens as a case study. *Philosophical Transactions of*  
613 *the Royal Society B: Biological Sciences*, **367**, 2881–2892.

Table 1: Fixed and varied parameter values used in each of the four scenarios. For scenarios 2-4, min and max set the minimum and maximum values of a uniform probability distribution within a random latin hypercube sampling approach.

| Parameter | Description                                   | Scenario 1 |       |     | Scenario 2 |     |     | Scenario 3 |       |      | Scenario 4 |       |     |
|-----------|-----------------------------------------------|------------|-------|-----|------------|-----|-----|------------|-------|------|------------|-------|-----|
|           |                                               | Fixed      | Fixed | Max | Fixed      | Max | Min | Max        | Fixed | Min  | Max        | Fixed | Min |
| $n_{sim}$ | Number of simulations                         | 1000       | 1000  |     | 1000       |     |     | 10000      |       |      | 10000      |       |     |
| type      | Type of sheet-based design*                   | QUSR       | QUSR  |     | QUSR       |     |     | QS         |       |      | S          |       |     |
| $r$       | Radius of roost (m)                           | 30         | 30    |     | 30         |     | 0   | 25         | 50    | 25   | 50         | 25    | 50  |
| $p$       | True prevalence                               | 0.1        |       | 1   |            |     |     | 0          | 1     | 0    | 1          | 0     | 1   |
| $p_u$     | Probability of urine contribution             | 0.5        | 0.5   |     | 0.5        |     |     | 0.2        | 0.8   | 0.2  | 0.8        | 0.2   | 0.8 |
| $s$       | Area of sheet <sup>†</sup> (m <sup>2</sup> )  | 0.25       | 0.25  |     | 0.25       |     |     | 0.25       |       | 0.25 | 2          | 0.25  | 2   |
| $h$       | Number sheets placed under roost <sup>‡</sup> | 100        | 100   |     | 100        |     |     | 100        |       | 100  | 150        | 25    | 150 |
| $d_s$     | Distance between sheets <sup>§</sup> (m)      | 2          | 2     |     | 2          |     |     | 2          |       | 2    | 5          | 0     | 5   |
| $n_t$     | Number of occupied roost trees                | 50         | 50    |     | 50         |     |     | 25         | 75    | 25   | 75         | 25    | 75  |
| $r_t$     | Mean radius occupied roost trees              | 3          | 3     |     | 3          |     |     | 2          | 6     | 2    | 6          | 2     | 6   |
| $\mu$     | Mean number individuals per tree              | 100        | 100   |     | 100        |     |     | 25         | 150   | 25   | 150        | 20    | 150 |
| shape     | Curvature of movement kernel                  | 0.8        | 0.8   |     | 0.8        |     |     | 0.5        | 2     | 0.5  | 2          | 0.5   | 2   |
| rate      | Movement decay rate at roost edge             | 1          | 1     |     | 1          |     |     | 1          | 2     | 1    | 2          | 1     | 2   |

\* Q=quadrant, U=uniform, S=stratified, and R=random

<sup>†</sup> Small-sheet designs only. Quadrant-design fixed at 2.34m<sup>2</sup> per sheet quadrant

<sup>‡</sup> Small-sheet designs only. Quadrant-design fixed at 40 (10 × 4 quadrants)

<sup>§</sup> Stratified design only

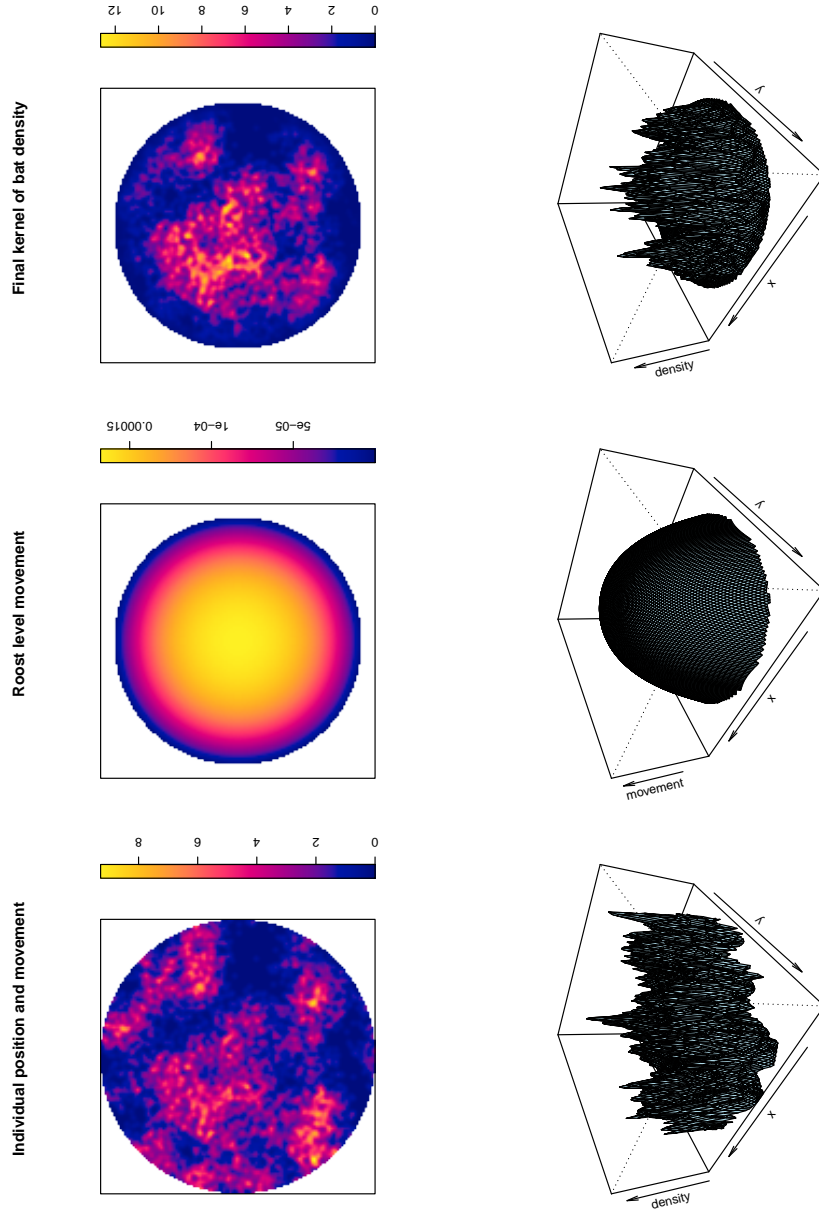

Figure 1: Illustration of one simulation of a kernel density estimation of bat density within a roost. The top row shows pixel-images and the bottom row shows perspective plots of: the density of roosting positions and individual-level movement around them (left), an isotropic Gompertz probability density function centered on the roost to model roost-level movement (middle), and the final estimated intensity function used to model bat density (right).



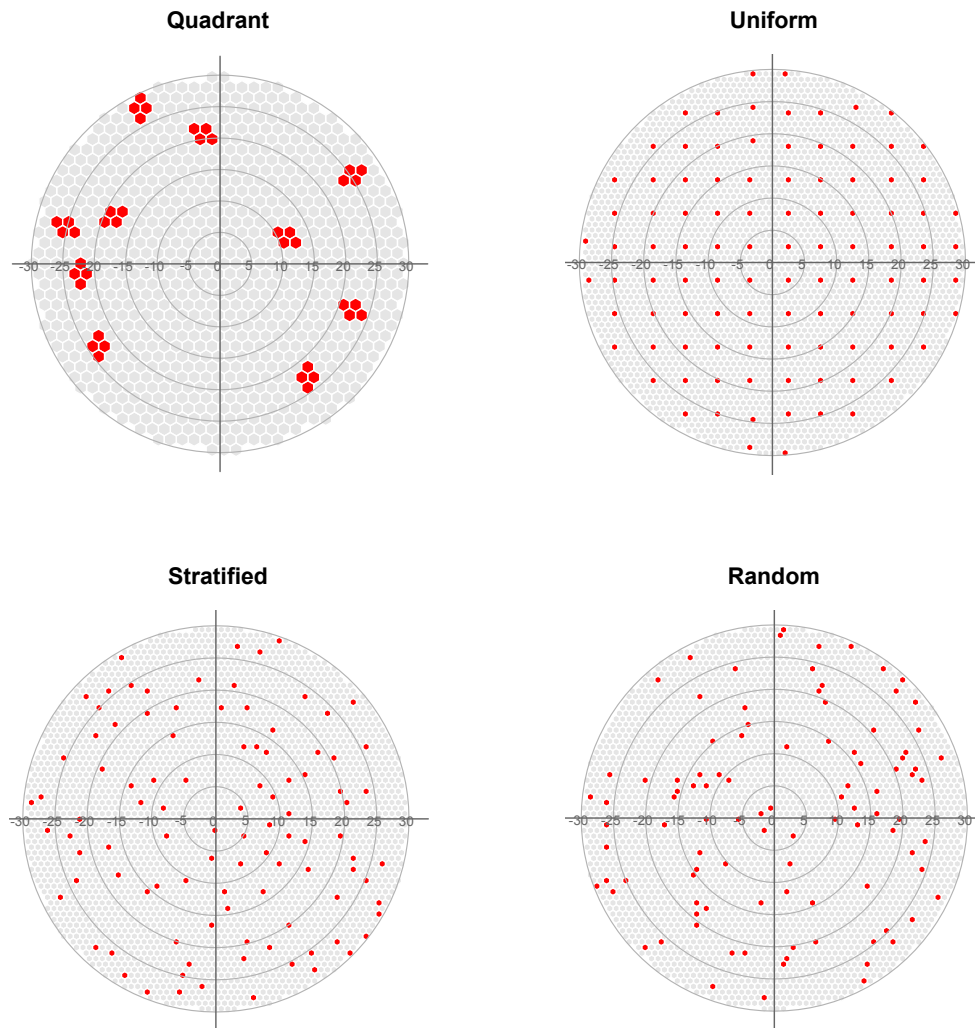

Figure 2: Examples of one simulation of each of the four under-roost sheet sampling designs explored in this study generated for a roost with a 30m radius. The quadrant design (top left), which follows methods found in previously published studies (Edson et al. 2015a, Field et al. 2011, 2015), is comprised of 10  $3.6 \times 2.6$ m sheets divided into  $1.8 \times 1.6$ m quadrants to produce 40 ( $10 \times 4$ ) quadrant-sized sheet areas for pooling urine samples. The other three designs (uniform, stratified, and random) are all ‘small-sheet’ designs that reduce sheet area, increase sheet number, and disperse sheets about the roost area. The small-sheet designs plotted above each contain 100  $1\text{m}^2$  sheets. The stratified design is generated using a sequential inhibition process with an inhibitory radius of 2m.

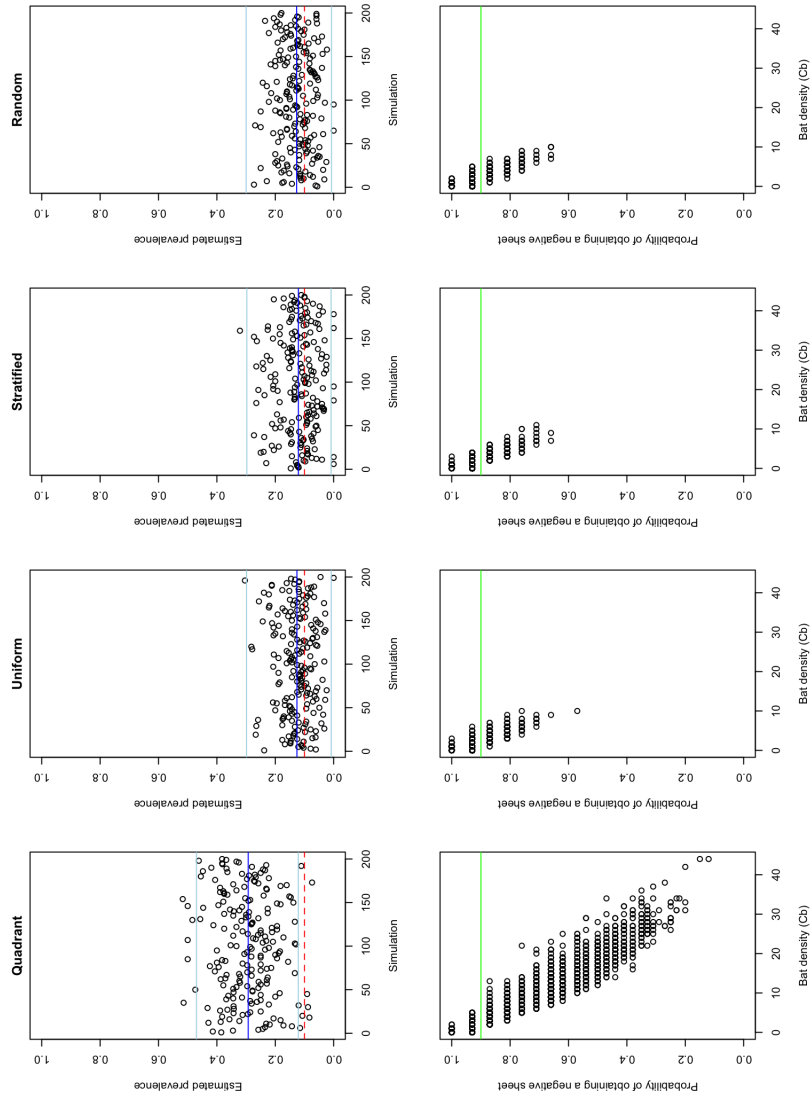

Figure 3: Results of scenario 1, where all parameters are fixed to facilitate comparison among the four sampling designs (Table 1). Top row displays the estimated prevalence of each simulation, with the mean of all simulations indicated by the blue line and the mean error due to sample size indicated by the light blue lines. The dashed red line indicates the fixed value of true prevalence (0.1). Bottom row displays the probability of obtaining a negative sheet  $(1 - p_u)^{D_b}$  as a function of the number of bats contributing urine to each sheet  $C_b$ . The green line indicates the expected probability of obtaining a negative sheet given by  $(1 - p)$ .

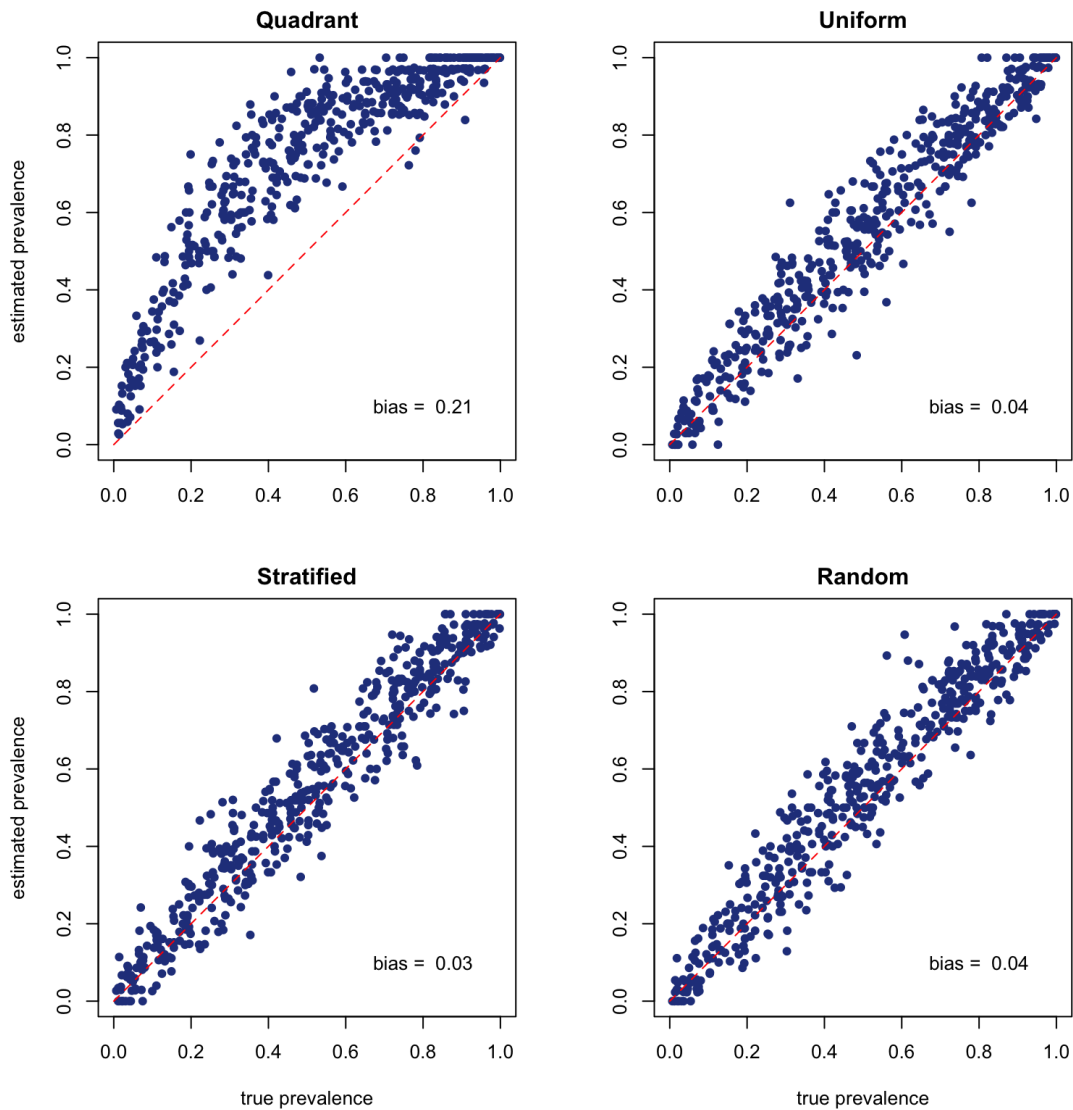

Figure 4: Results of 1000 simulations performed over all possible values of true prevalence for four different under-roost sheet sampling designs (see scenario 2 in Table 1). The dashed red line indicates  $\hat{p} = p$ , and mean estimation bias for all simulations is printed in the lower right corner of each plot.

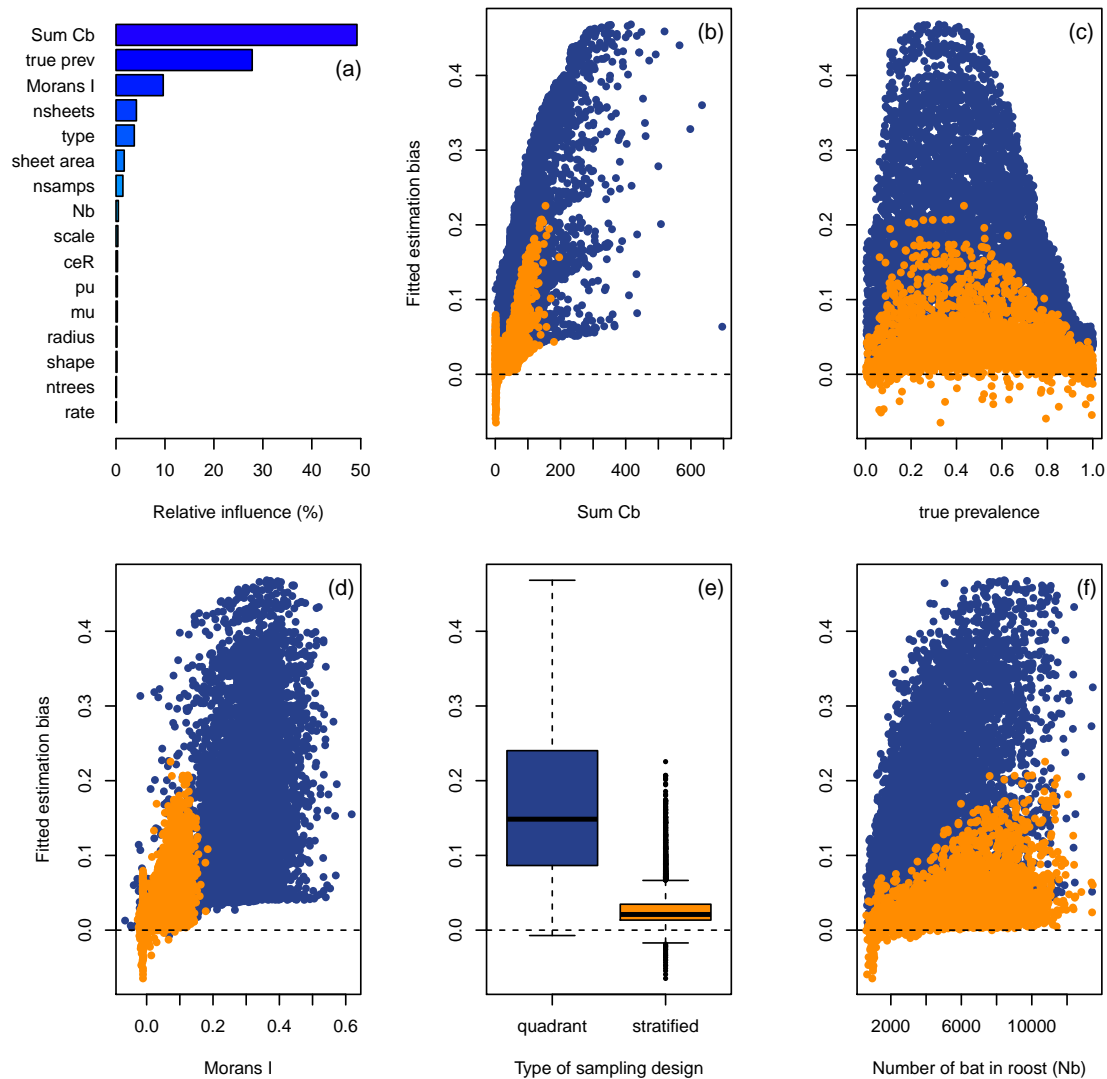

Figure 5: Results of the global sensitivity analysis performed in scenario 3, where the quadrant (blue points) and stratified (orange points) designs are compared to determine what drives differences in estimation bias between the two designs. Table 1 shows the parameters used in the simulation. The barplot (a) shows the relative influence of each parameter determined by a boosted regression tree emulator. Plots e–f show the value of estimation bias fitted by the emulator as a function of five influential parameters.

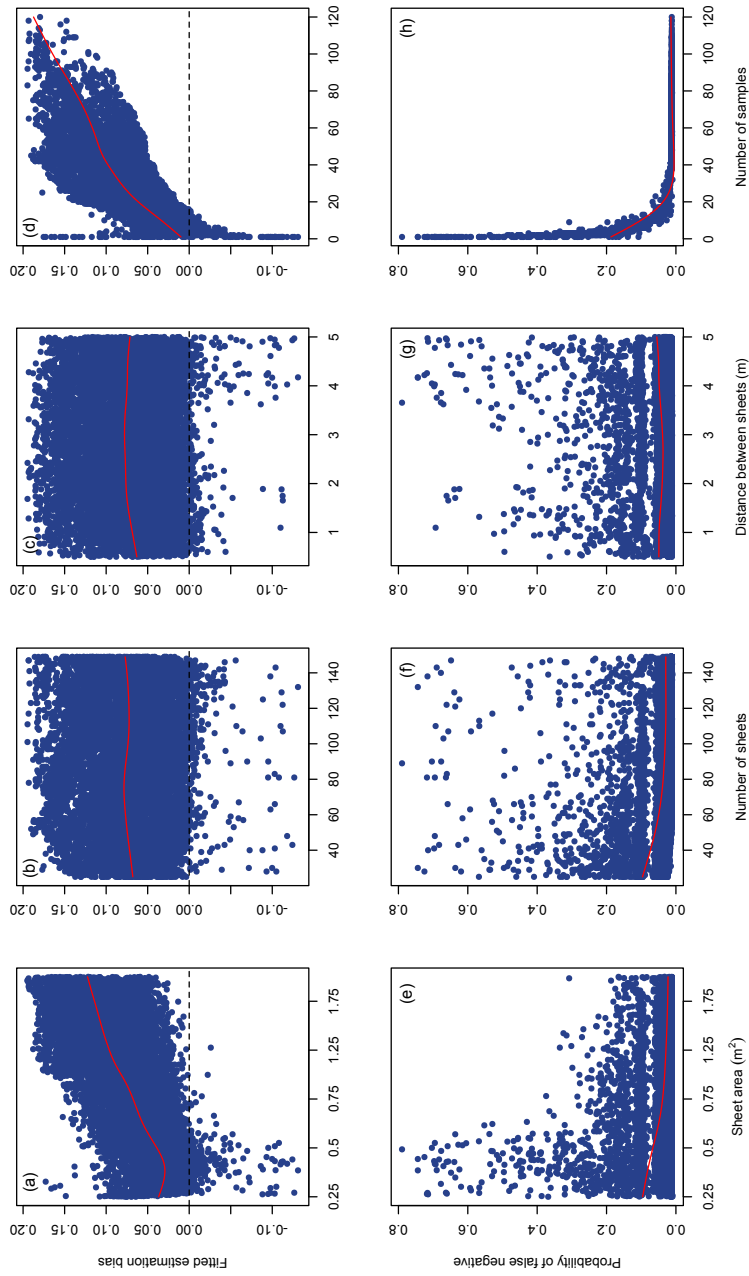

Figure 6: Global sensitivity analysis of scenario 4, where the influence of sheet dimension parameters are explored to determine optimal application of the stratified sheet sampling design. The plots display results from two boosted regression tree emulators: one for estimation bias (top row), and the other for the probability of false negatives (bottom row). Each response is plotted against sheet dimension parameters (from left to right): sheet area  $s$ , number of sheets  $h$ , minimum distance between sheets  $d_s$ , and number of samples collected  $n_s$ . The red lines indicate the trend of the points given by smooth spline regression (`sreg` function in the `fields` R package; Nychka et al. (2015)).

614

## Supplementary Material

615

### Optimizing non-invasive sampling of an infectious bat virus

616

John R. Giles, Alison J. Peel, Konstans Wells, Raina K. Plowright,

617

Hamish McCallum, and Olivier Restif

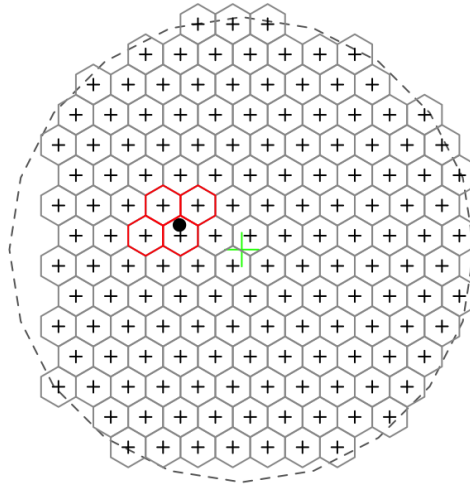

Figure S1: Example of construction how sheet areas are defined using the quadrant-based under-roost sheet sampling technique. The schematic shows a grid of hexagonal tiles filling a circular roost area. Cell centroids are marked with a black cross. One large sheet with four quadrants is made by selecting a sheet location (black point) and then selecting the four nearest centroids.

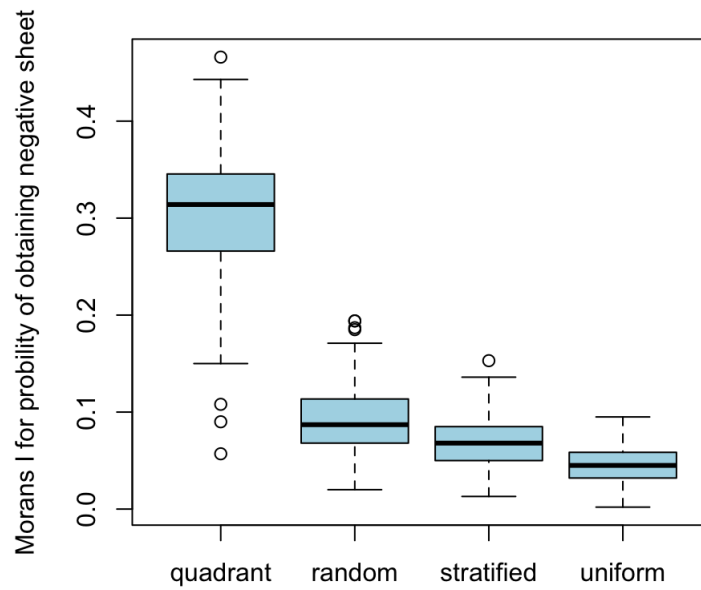

Figure S2: Boxplots showing the variation in Moran's I calculated as part of the local sensitivity analysis in Simulation 1. The amount of spatial autocorrelation in the probability of obtaining a negative sheet is shown on the y-axis, and the four under-roost sheet sampling designs on the x-axis.



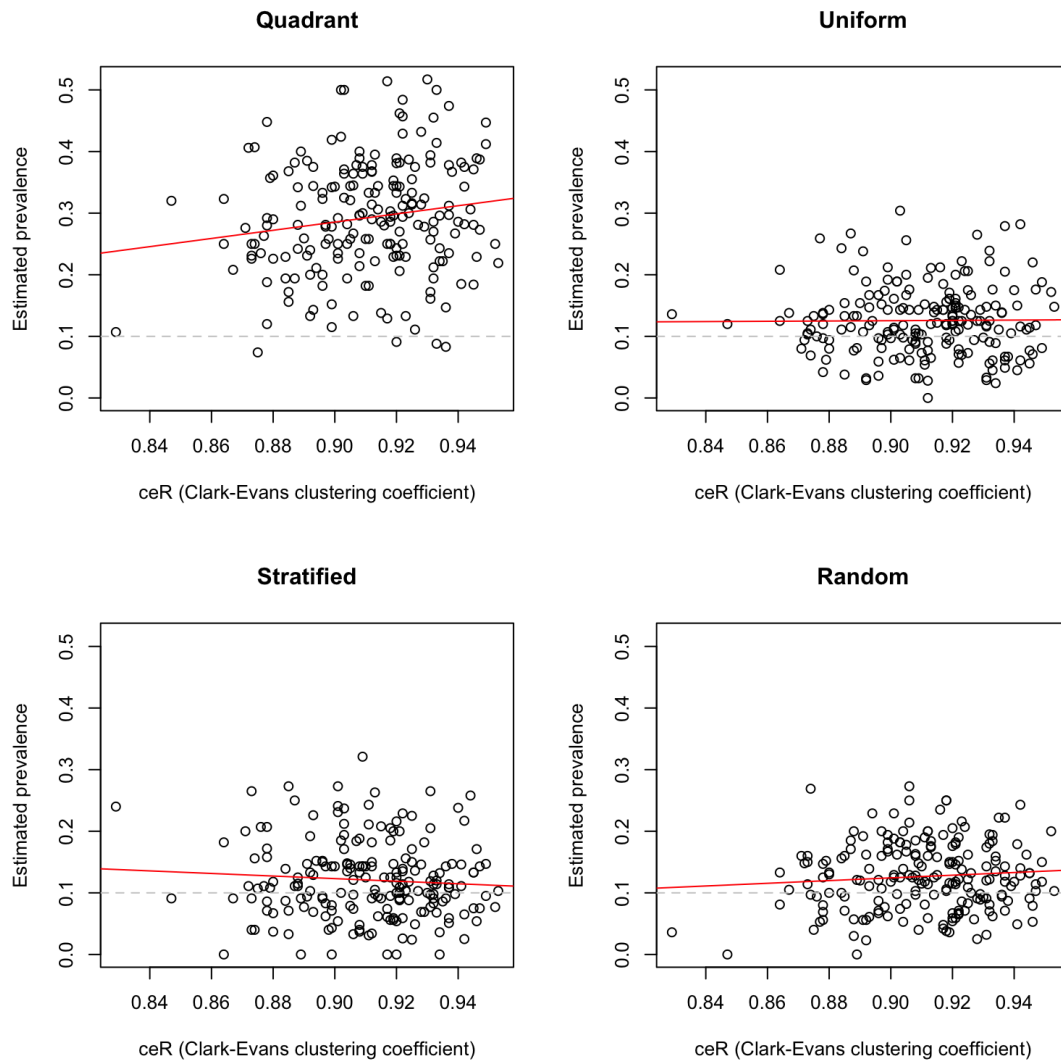

Figure S3: Scatterplots showing the variation in the Clark-Evens R clustering coefficient calculated as part of the local sensitivity analysis in scenario 1. The Clark-Evens R gives a measure of how clustered bat roosting positions are within the simulated roost. For each of the four sheet sampling designs, the estimated values of viral prevalence ( $\hat{p}$ ) is plotted on the y-axis, and the Clark-Evens R (ceR) is plotted on the x-axis. Linear model trend lines are shown in red and the value of true prevalence ( $p$ ) set in the local sensitivity analysis is the dashed gray line.

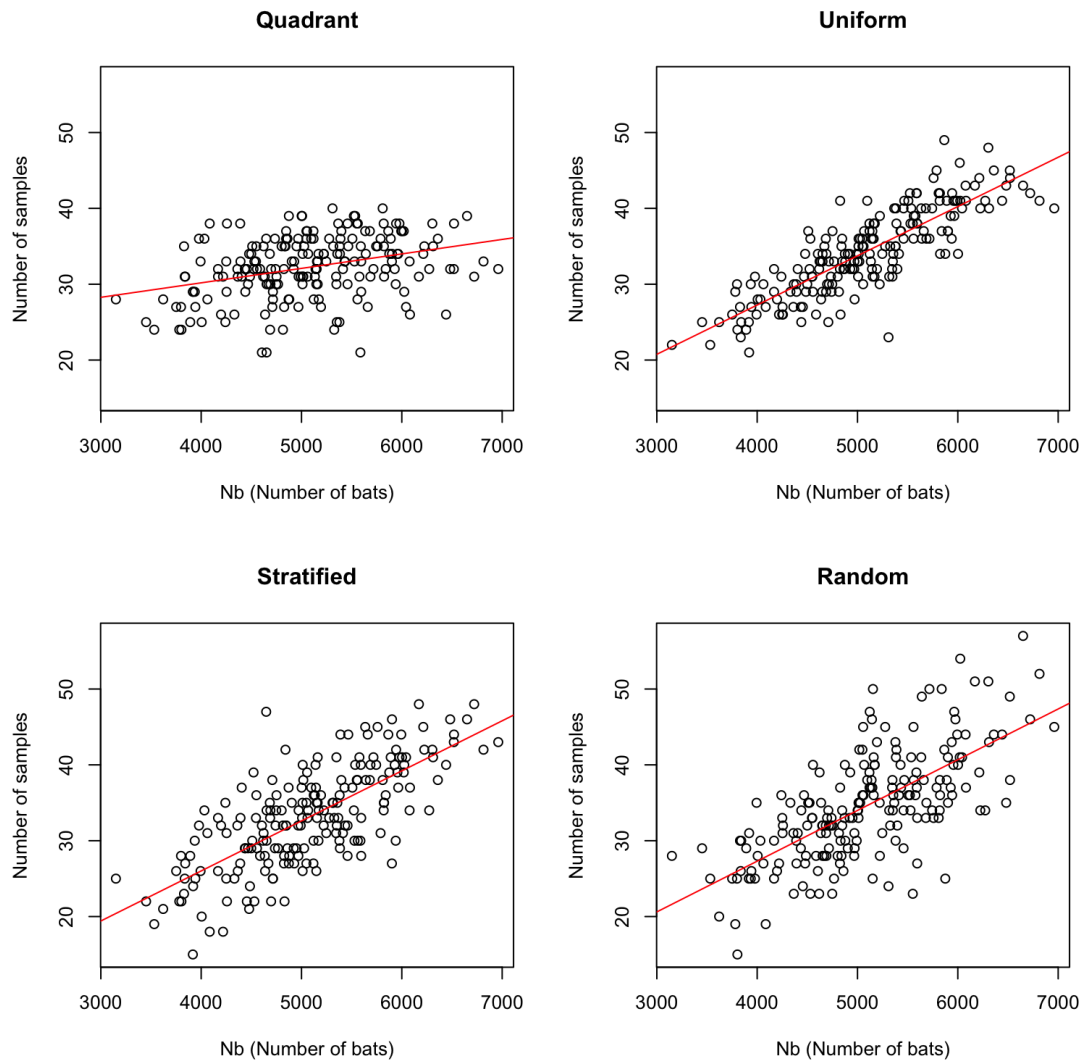

Figure S4: Scatterplots showing the variation in the number of total bats in the roost ( $N_b$ ) calculated as part of the local sensitivity analysis in scenario 1. For each of the four sheet sampling designs, the estimated values of viral prevalence ( $\hat{p}$ ) is plotted on the y-axis, and the number of bats ( $N_b$ ) is plotted on the x-axis. Linear model trend lines are shown in red and the value of true prevalence ( $p$ ) set in the local sensitivity analysis is the dashed gray line.

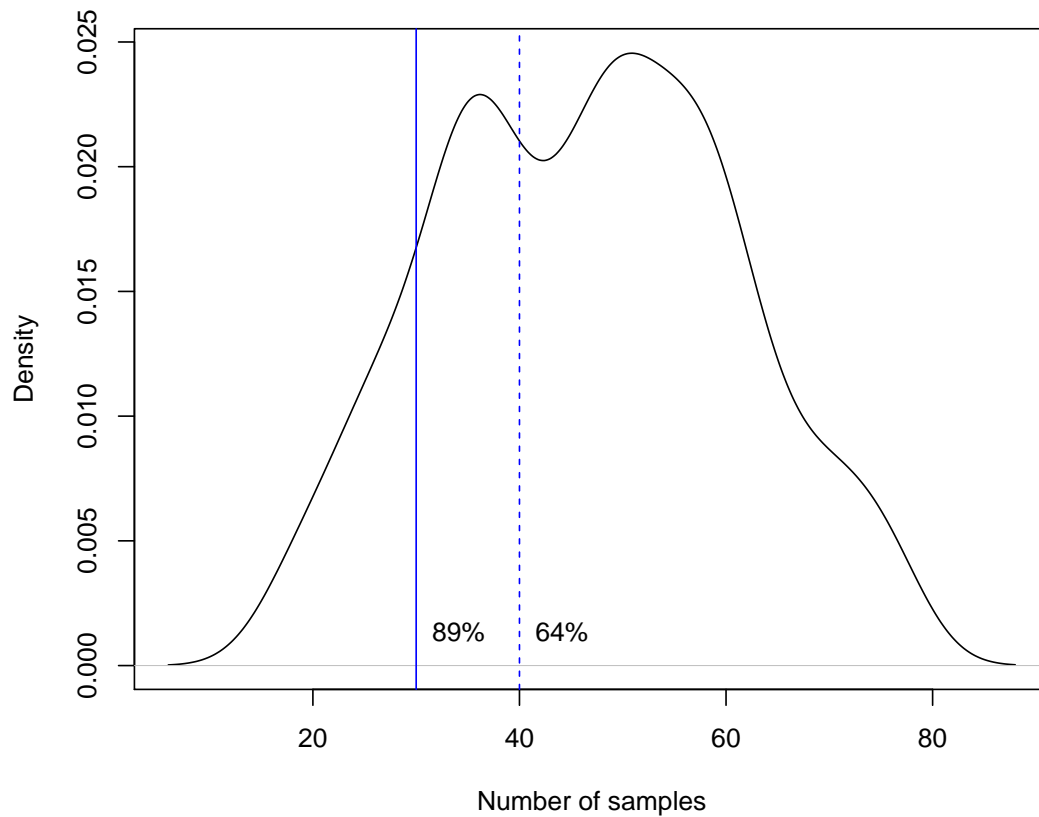

Figure S5: Distribution of the number of samples collected for simulations that use a stratified sheet sampling design at a roost of  $> 5000$  individuals, where the number of sheets  $n_s$  is 80–100, the area of the sheets  $s$  is 0.75–1m<sup>2</sup>, and the distance between the sheets is 1–3m. Based on our results, 89% of simulations had at least 30 sheets that collected a urine sample, and 64% that collected at least 40 samples.
